# Supplementary material for: Non-Hematopoietic Cells in Lymph Nodes Drive Memory CD8 T Cell Inflation during Murine Cytomegalovirus Infection
Source: PubMed Central journal article supplement (PMC3203160; doi:10.1371/journal.ppat.1002313), 2011-10-27

Fig. S4

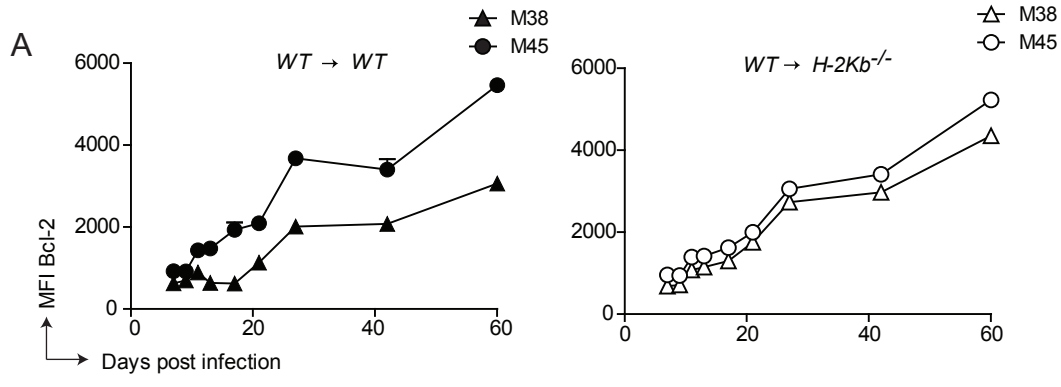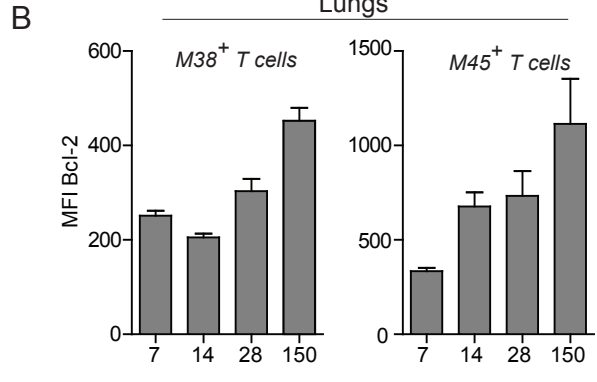

Supplement: ppat.1002313.s004.pdf [file ppat.1002313.s004.pdf]
